# Supplementary material for: CoS1.097 nanocrystals as new nanoplatforms for photothermal therapy of arterial inflammation
Source: Royal Society of Chemistry journal article supplement (doi:10.1039/d4ra04006f), 2024-01-01
Supplement: d4ra04006f1.pdf [file d4ra04006f1.pdf]

## **CoS<sub>1.097</sub> nanocrystals as new nanoplatforms for photothermal therapy of arterial inflammation**

Ran Lu,<sup>a</sup> Zaiman Ge,<sup>b,\*</sup> Zeyu Guan,<sup>a</sup> Yong Sun,<sup>a, b</sup> Xiaogao Wang,<sup>a</sup> Bing Liu<sup>c,\*</sup>

<sup>a</sup> Department of vascular surgery, The First Affiliated Hospital of Bengbu Medical University, Bengbu 233004, Anhui, China.

<sup>b</sup> Department of general surgery, Baoshan people's Hospital, Baoshan 678000, Yunnan, China.

<sup>c</sup> Department of vascular surgery, The Affiliated Hospital of Qingdao University, Qingdao 266000, Shandong, China.

\*Correspondence Emails: Z. M. Ge, GZM15887672801@163.com; B. Liu, qyfyliubing@163.com.

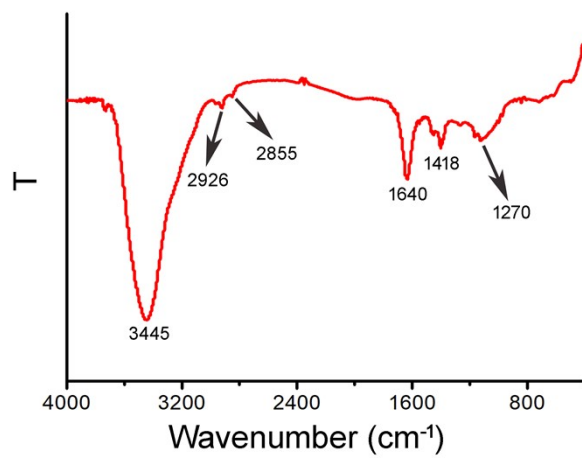

**Figure S1.** FTIR spectra of CoS<sub>1.097</sub> nanocrystals, PVP as the surfactant.

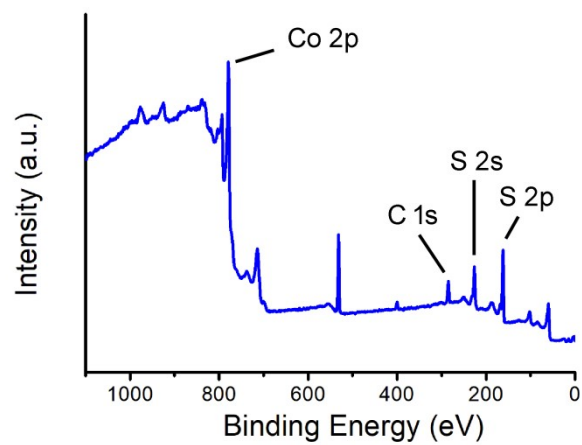

**Figure S2.** XPS spectrum of the  $\text{CoS}_{1.097}$  nanocrystals.

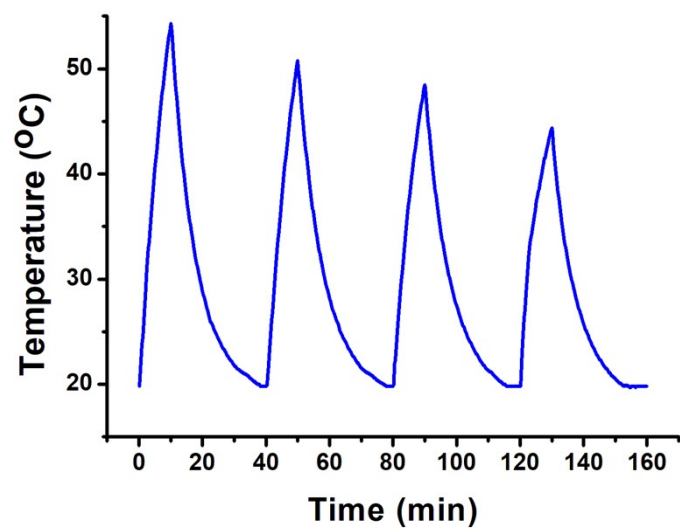

Figure S3. Temperature elevation of CoS<sub>1.097</sub> nanocrystals over four LASER ON/OFF cycles of NIR laser irradiation.

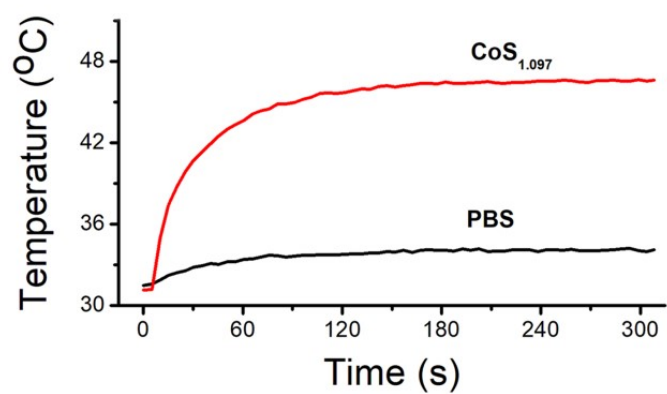

Figure S4. Temperature change during the photothermal therapy of ApoE<sup>-/-</sup> mice treated by injection of PBS / CoS<sub>1.097</sub> nanocrystals combined with the 808 nm laser irradiation (0.4 W cm<sup>-2</sup>) for 300 s.

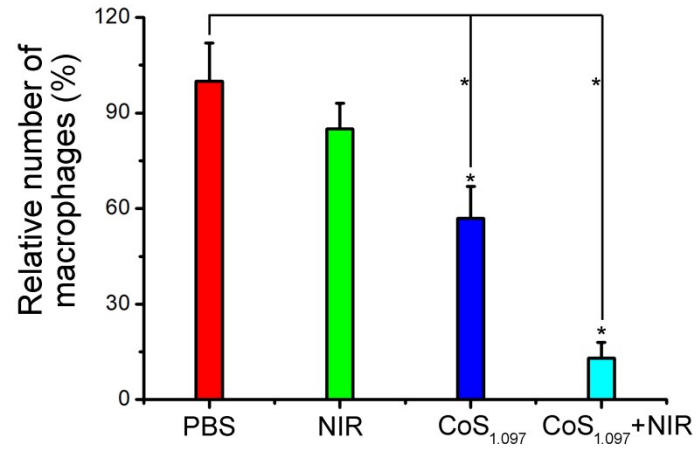

Figure S5. Quantification of the number of macrophages in different groups according to Figure 4. \*P < 0.05. Data shown are representative of three independent experiments.

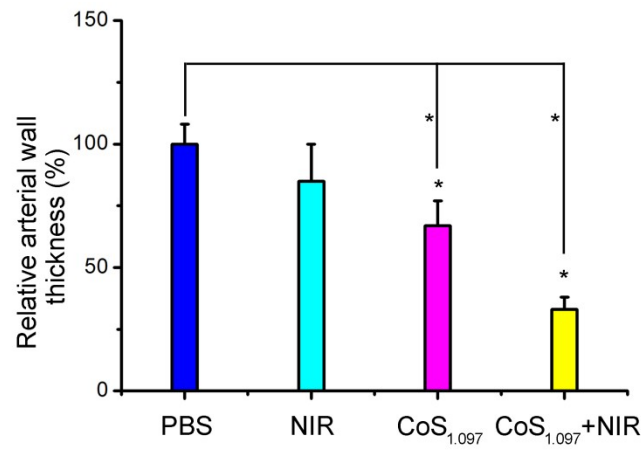

Figure S6. The vascular wall thickness of the carotid artery in different groups. \*P < 0.05. Data shown are representative of three independent experiments.

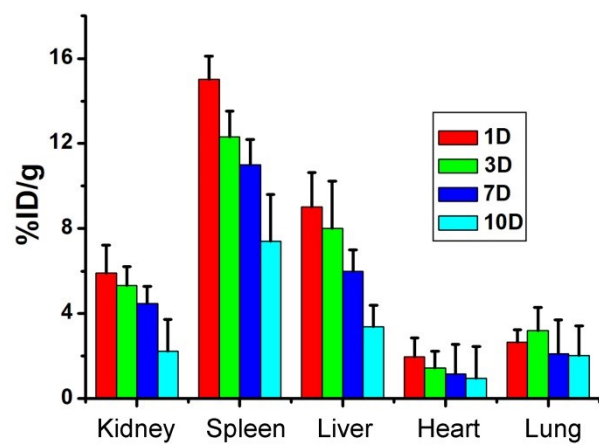

**Figure S7. Biodistribution of CoS<sub>1.097</sub> nanocrystals in major organs.**
